# Supplementary material
Source: PubMed Central journal article supplement (PMC3402046)
Supplement: NIHMS388215-supplement-Figure_S1.pdf [file NIHMS388215-supplement-Figure_S1.pdf]

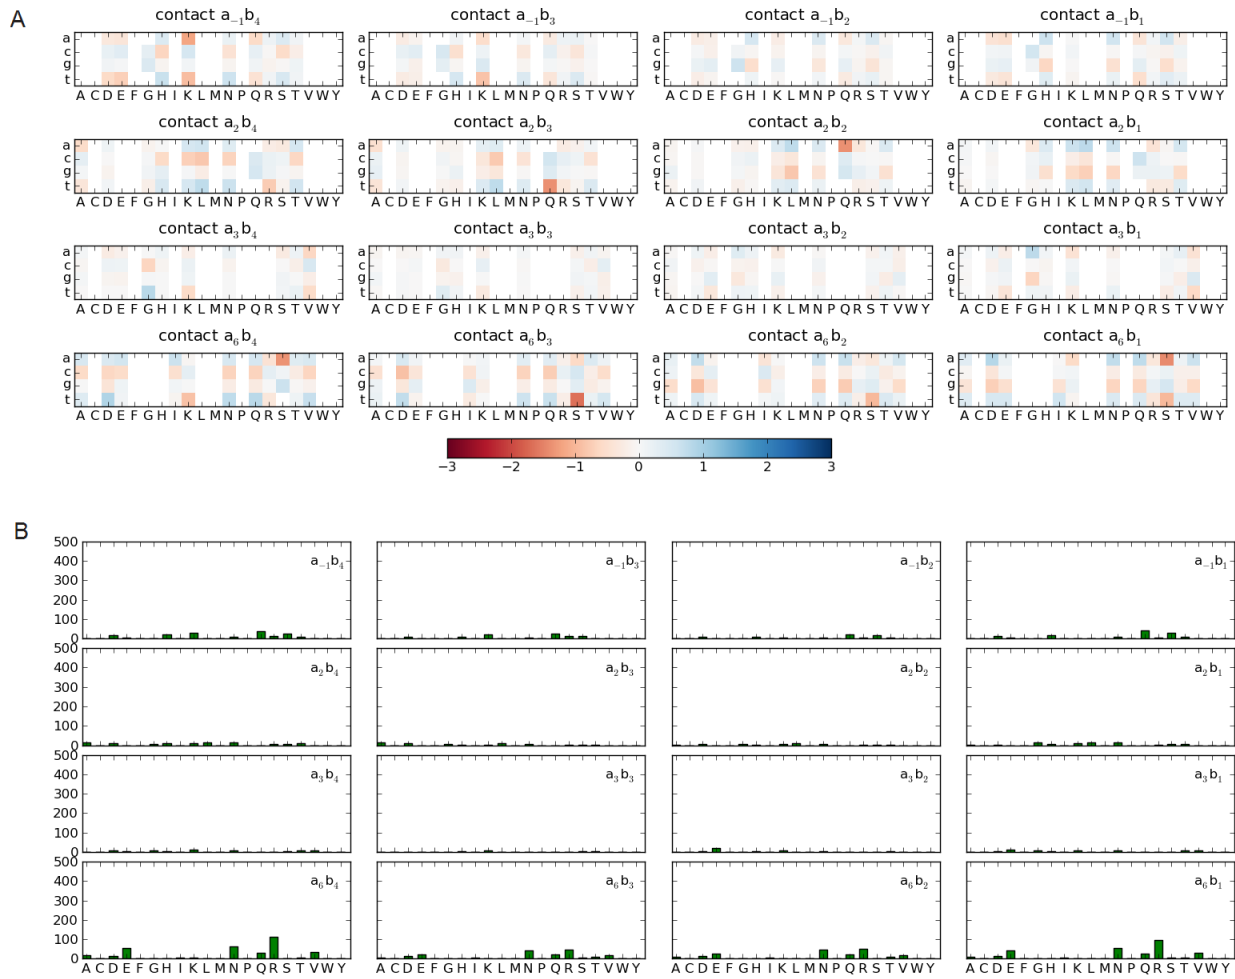

**Figure S1.** (A) Heat plot of log-odd scores for observed versus expected nucleotide frequencies in negative examples for each amino acid in each of the 16 contacts; (B) the corresponding  $\chi^2$  values.
