# Supplementary material
Source: PubMed Central journal article supplement (PMC3402046)
Supplement: NIHMS388215-supplement-Figure_S2.pdf [file NIHMS388215-supplement-Figure_S2.pdf]

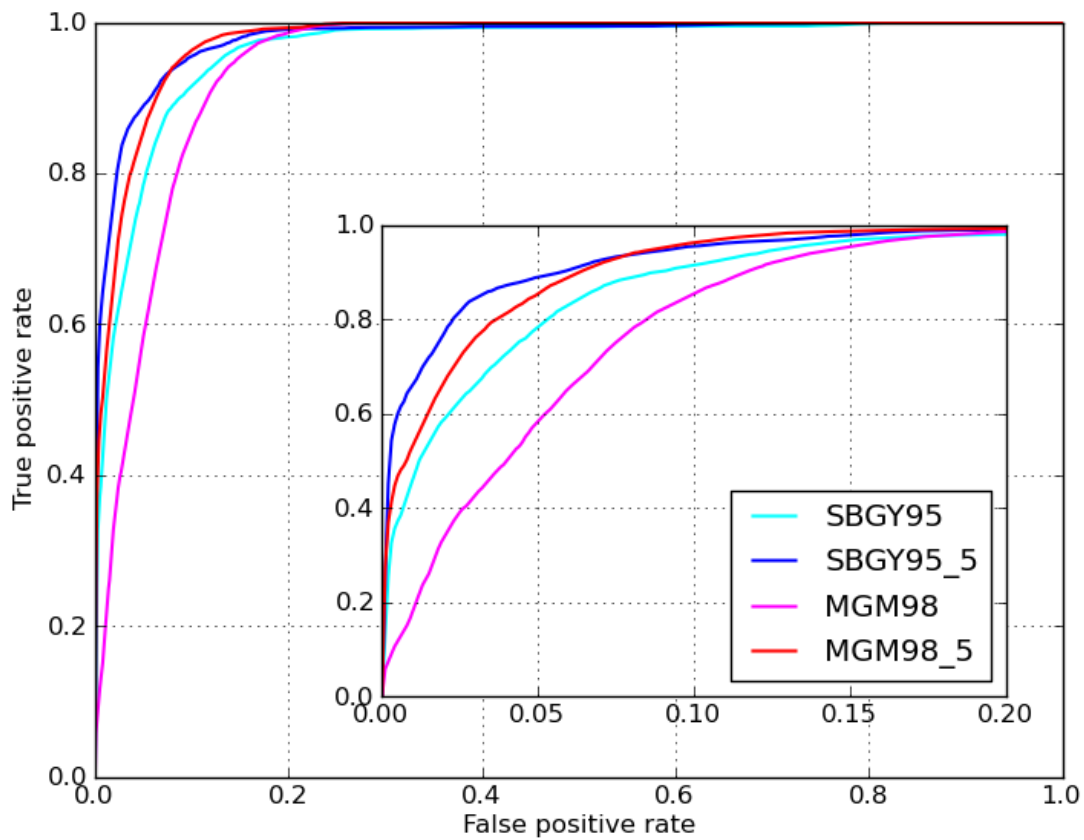

**Figure S2.** ROC curves for data used in cross-validation testing of non-SVM methods: SBGY95 based on the canonical model (cyan) and based on consensus 5-contact binding model (blue); MGM98 based on the canonical model (magenta) and based on consensus 5-contact binding model (red).
