# Supplementary material
Source: PubMed Central journal article supplement (PMC3402046)
Supplement: NIHMS388215-supplement-Figure_S3.pdf [file NIHMS388215-supplement-Figure_S3.pdf]

A

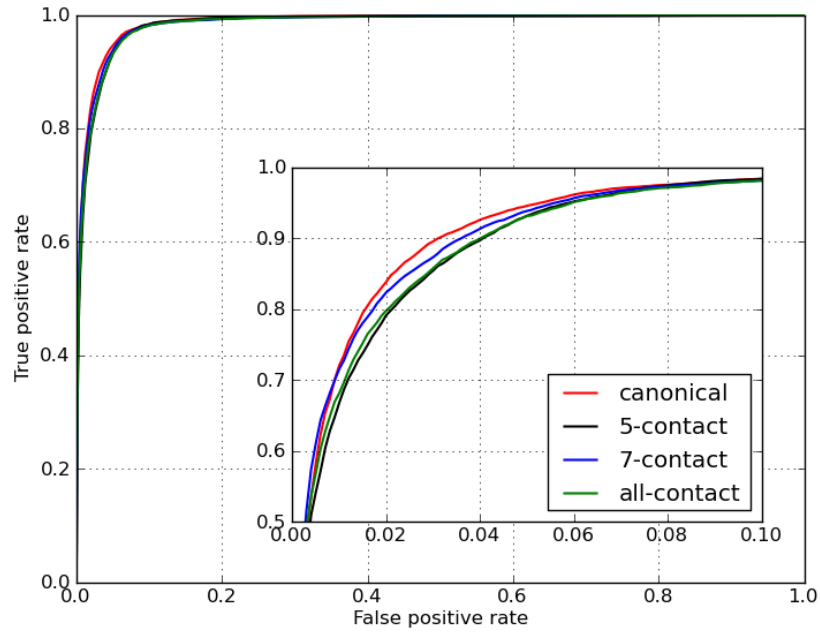

B

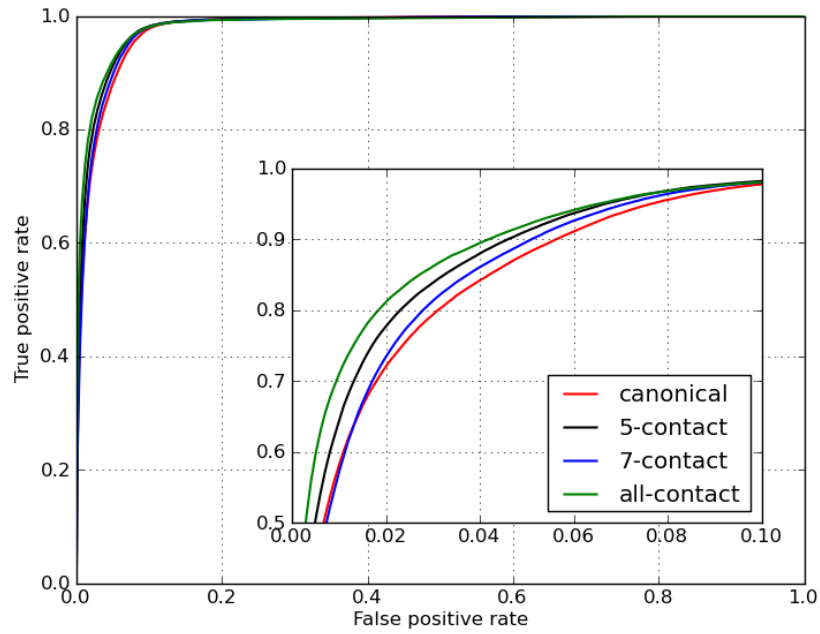

**Figure S3.** ROC curves for cross-validation testing of SVMs based on different structural models: (A) polynomial SVM kernel; (B) linear SVM kernel.
